# Supplementary material for: Comparative Genomic Analysis Reveals the Emergence of ST-231 and ST-395 Klebsiella pneumoniae Strains Associated with the High Transmissibility of blaKPC Plasmids
Source: MDPI journal article supplement (doi:10.3390/microorganisms11102411), 2023-09-27
Supplement: s1 [file s1]

Supplementary figures

(A)

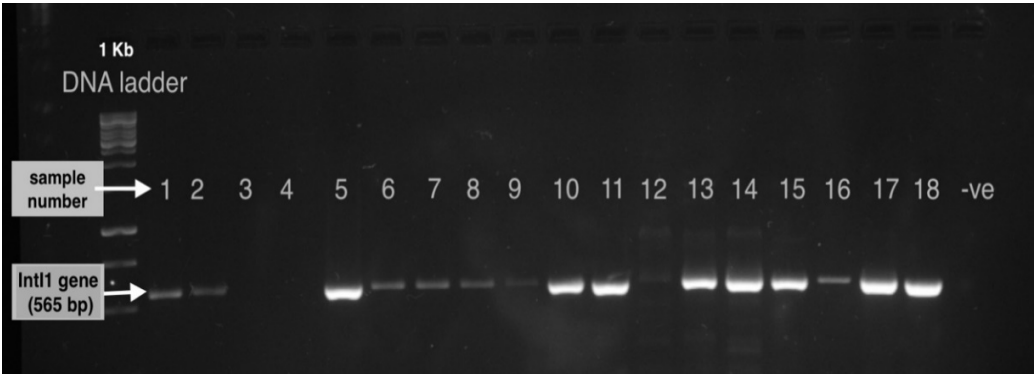

(B)

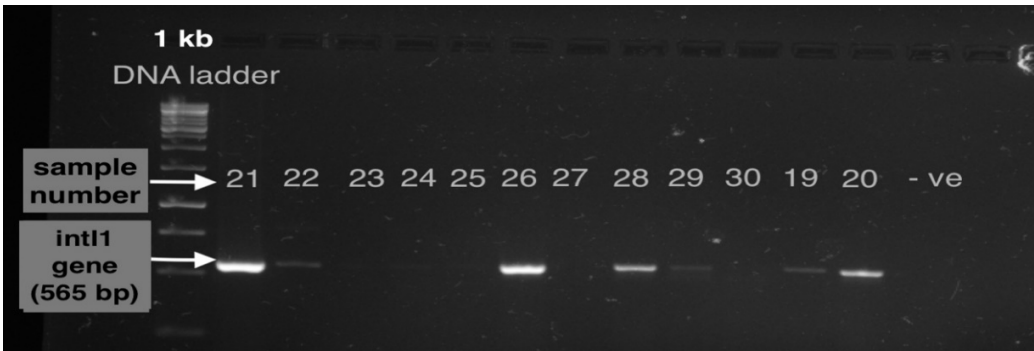

(C)

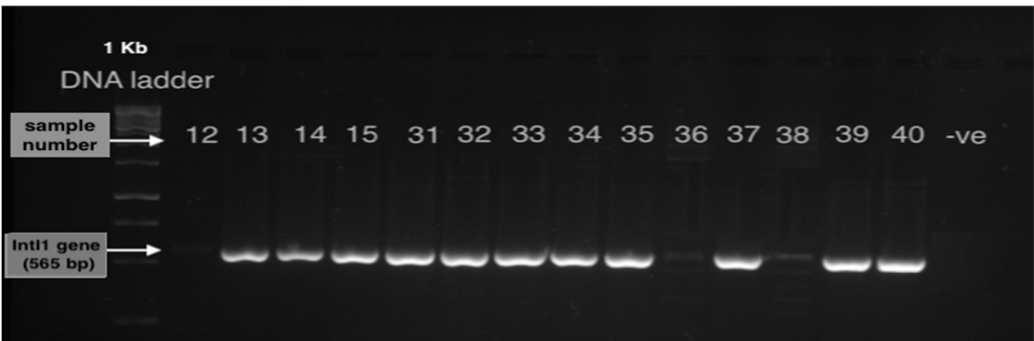

(D)

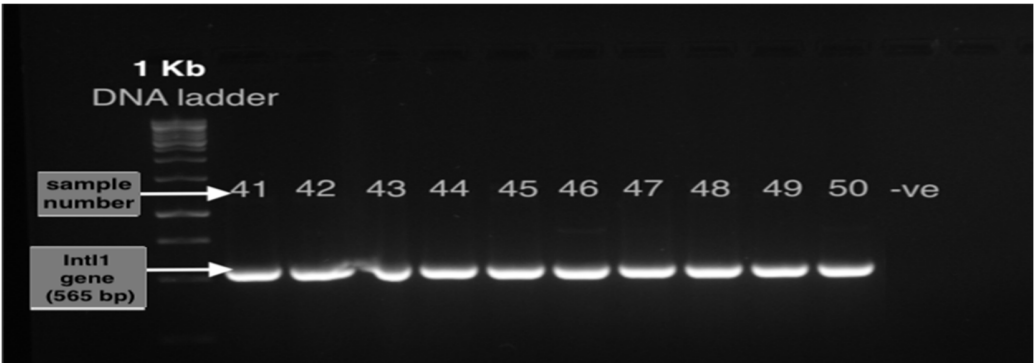

**Supplementary Figure S1 Agarose gel electrophoresis of class 1 integrons (IntI1 gene).**

(A, B, C, D) lane (1) 1 Kb DNA ladder, lane (2-19) *K. pneumoniae* isolates in A, (19-30) in B, (31-40) in C isolates 12, 13, 14 and 15 are repeated, and (41-50) in D. (-ve) negative control for integron gene.

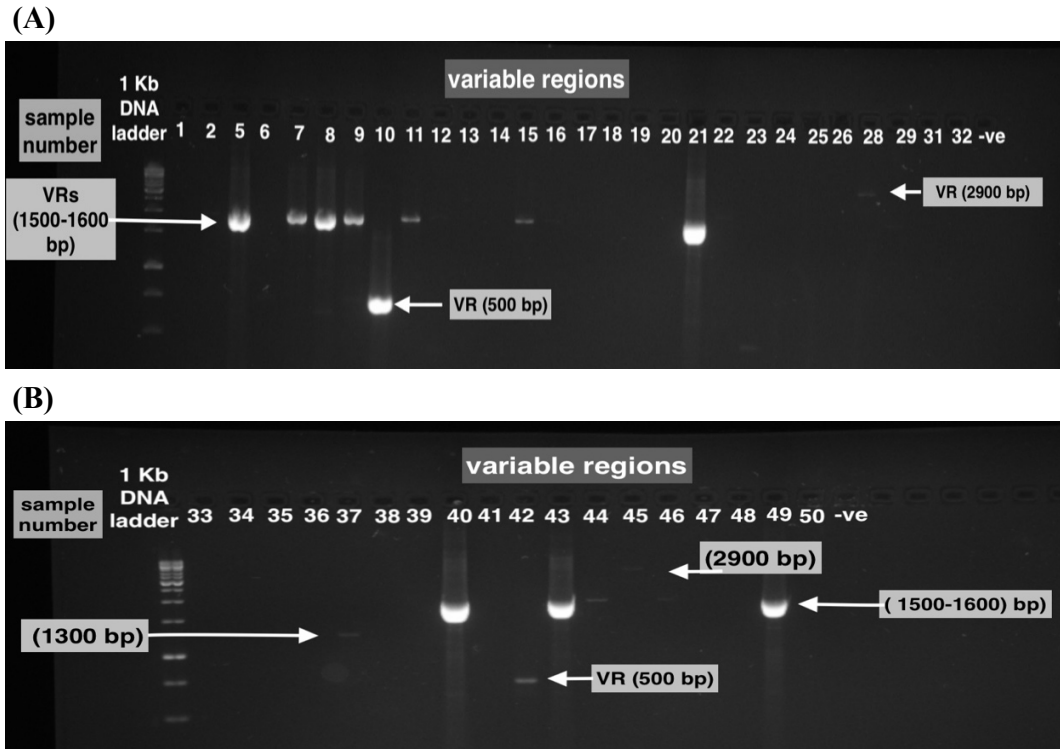

**Supplementary Figure S2. Agarose gel electrophoresis of variable regions genes in 50 *K. pneumoniae* isolates.**

(A) and (B), lane (1) 1 Kb DNA ladder, lane (2-29) *K. pneumoniae* isolates in A, and (2-19) in B. (-ve) negative control for the variable gene.

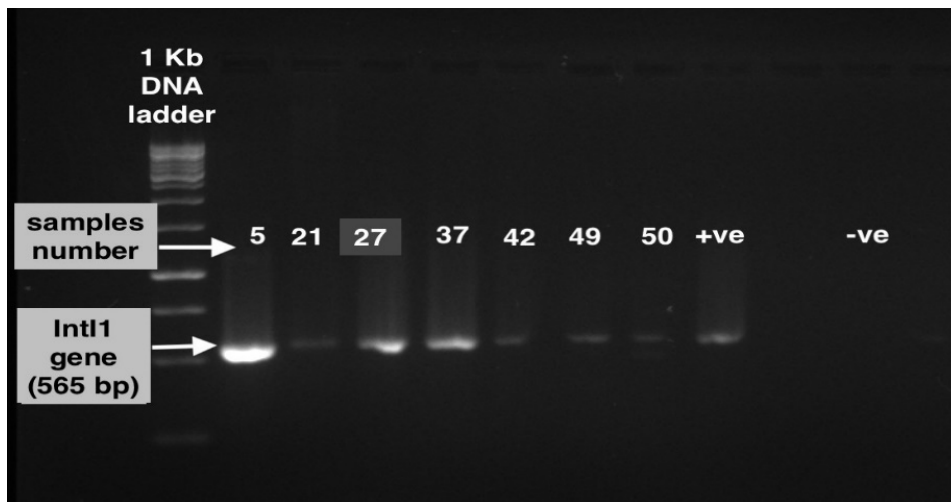

**Supplementary Figure S3. Agarose gel electrophoresis of class 1 integron gene in trans-conjugant colonies from the conjugation experiment (n=7).** lane (1) 1 Kb DNA ladder, lane (2-8) *intI1* as conjugation experiment products (+ve) positive control, and (-ve) negative control.
